# Supplementary material
Source: HighWire-hosted journal article supplement (https://jnm.snmjournals.org/highwire/filestream/99034/field_highwire_adjunct_files/0/238568_Supplemental_Data.pdf)
Supplement: 238568_Supplemental_Data.pdf [file 238568_Supplemental_Data.pdf]

**Supplemental Figure 1:**

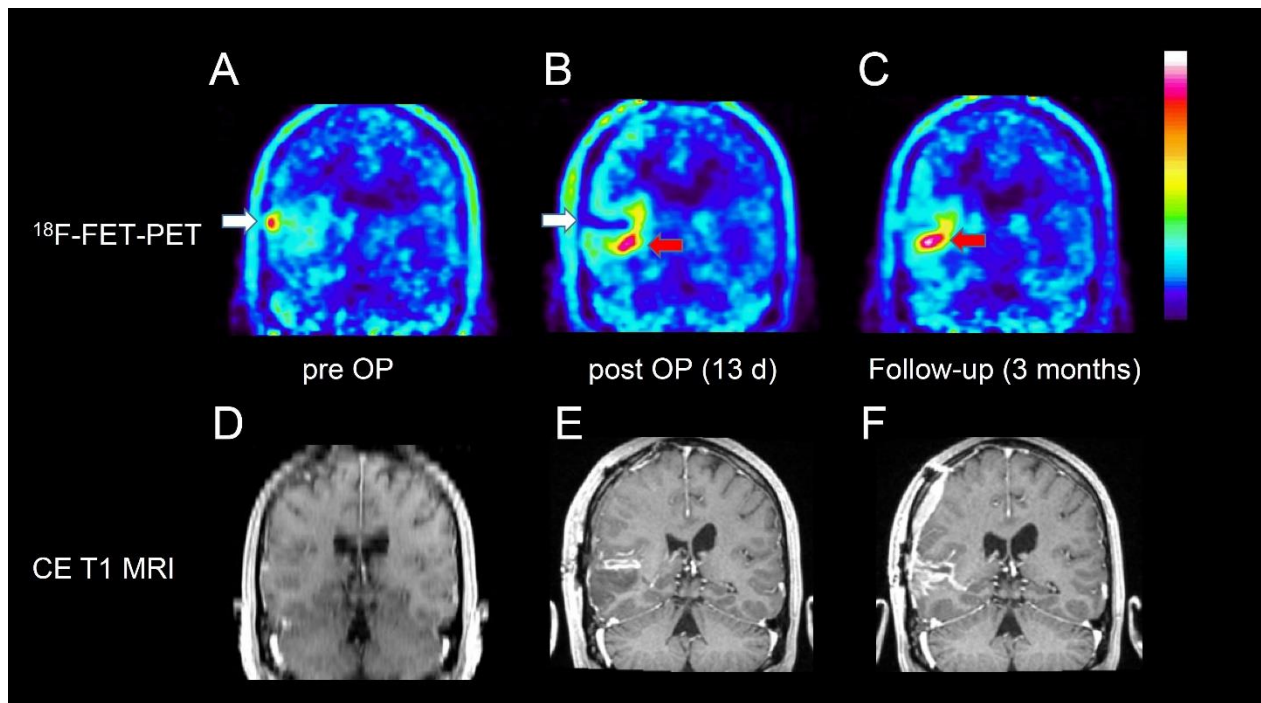

Coronal brain slices of a patient with temporal glioblastoma WHO grade IV in the right hemisphere (Pat. No 17): Pre-, postoperative, and follow-up  $^{18}\text{F}$ -FET PET (A - C), and corresponding contrast-enhanced T1-weighted MRI (D - F).  $^{18}\text{F}$ -FET PET after surgery (B) shows resection of the  $^{18}\text{F}$ -FET positive area (white arrow) in the preoperative scan (A), but a flare phenomenon is noted medial to the resection cavity (red arrow). The follow-up PET after chemotherapy shows a progressive tumor in that area.
